# Supplementary material for: MOF derived CoO-NCNTs two-dimensional networks for durable lithium and sodium storage
Source: Royal Society of Chemistry journal article supplement (doi:10.1039/c8ta10575h), 2019-01-01
Supplement: c8ta10575h1.pdf [file c8ta10575h1.pdf]

## Supporting Information

### Cobalt oxide combined with carbon nanotubes into two-dimensional networks derived from lamellar coordination polymer for durable lithium and sodium storages

*Yuanchao Pang, Sheng Chen, Chunhui Xiao, Sude Ma, Shujiang Ding\**

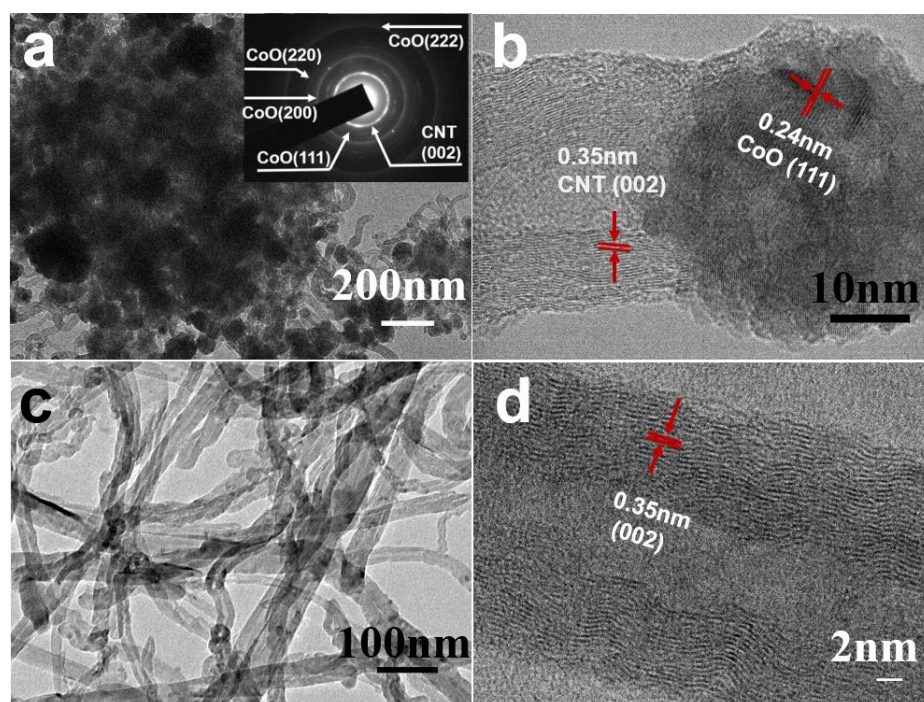

Figure S1. TEM image (a), SAED analysis (inset of a), and HRTEM images (b) of CoO-NCNTs. TEM morphology of vigorously ultrasonic treatment of CoO-NCNTs (c, d) in different magnifications.

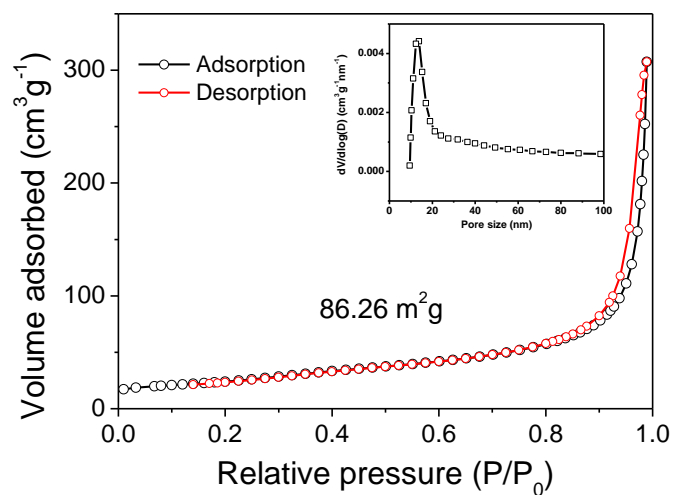

Figure S2. Nitrogen adsorption/desorption isotherms of CoO-NCNTs; inset: The pore size distribution calculated using the BJH method basing on the desorption curve.

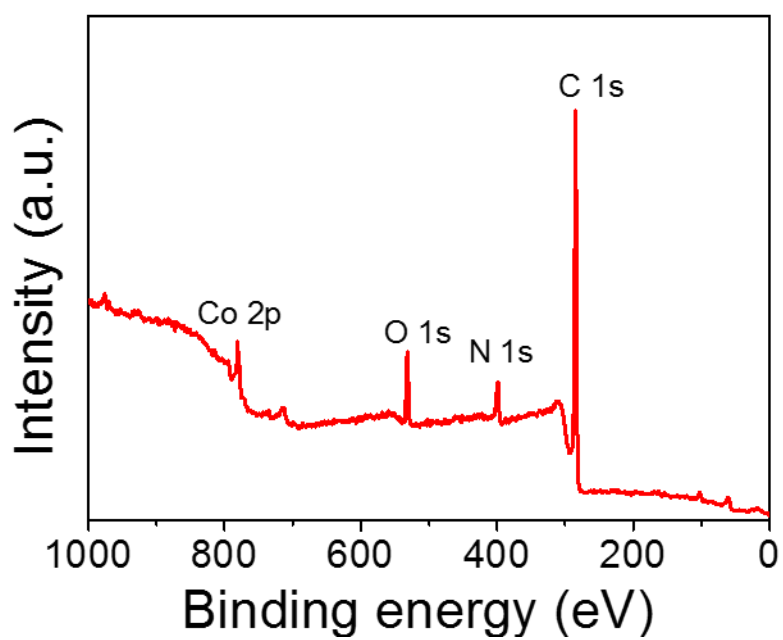

Figure S3. XPS survey spectrum of CoO-NCNTs.

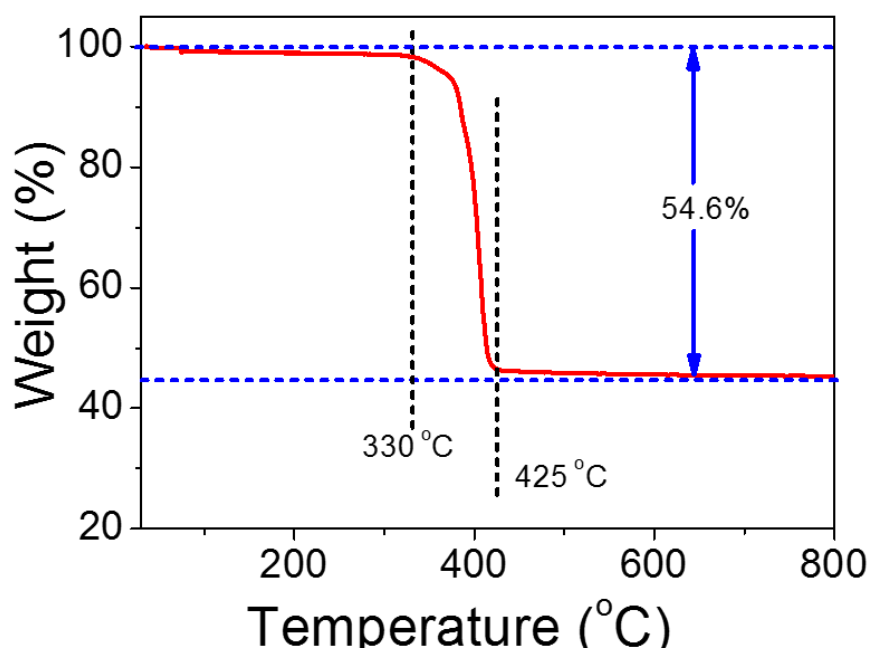

Figure S4. Thermogravimetric analysis of CoO-NCNTs.

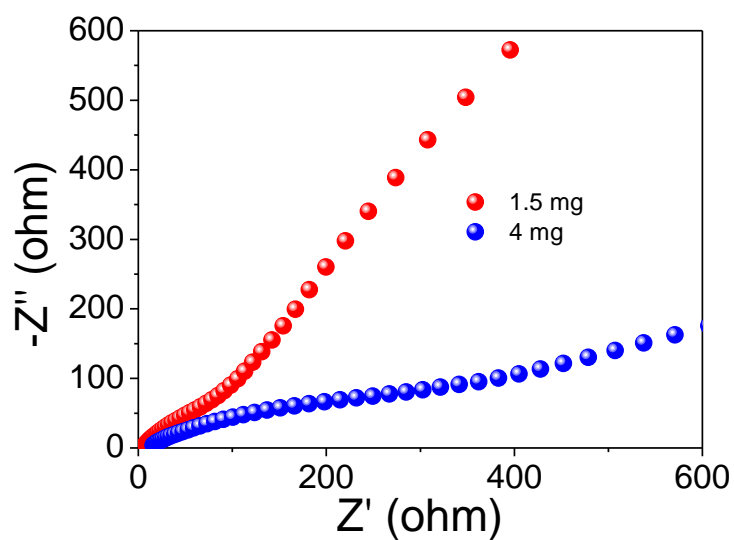

FigureS5. Electrochemical impedance comparison spectra (EIS) of CoO-NCNTs materials for LIBs with different loading mass.

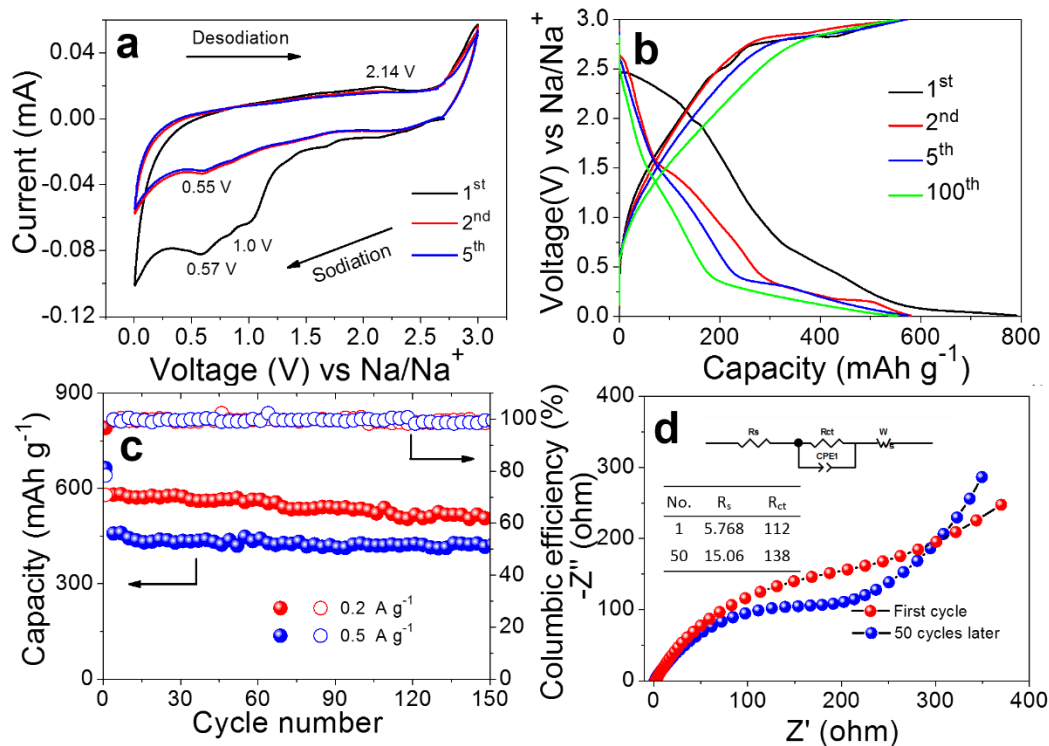

Figure S6. Electrochemical performances of CoO-NCNTs for sodium storage. (a) Cyclic voltammograms at a scan rate of  $0.5 \text{ mV s}^{-1}$ . (b) Selected galvanostatic charge-discharge voltage profiles of at current density of  $0.2 \text{ A g}^{-1}$ . (c) Cycling performances at distinct current densities of  $0.2$  and  $0.5 \text{ A g}^{-1}$ . (d) Electrochemical impedance spectra (EIS) in selected cycles, and the equivalent circuit diagram, as well as the three-line table of relative resistances.

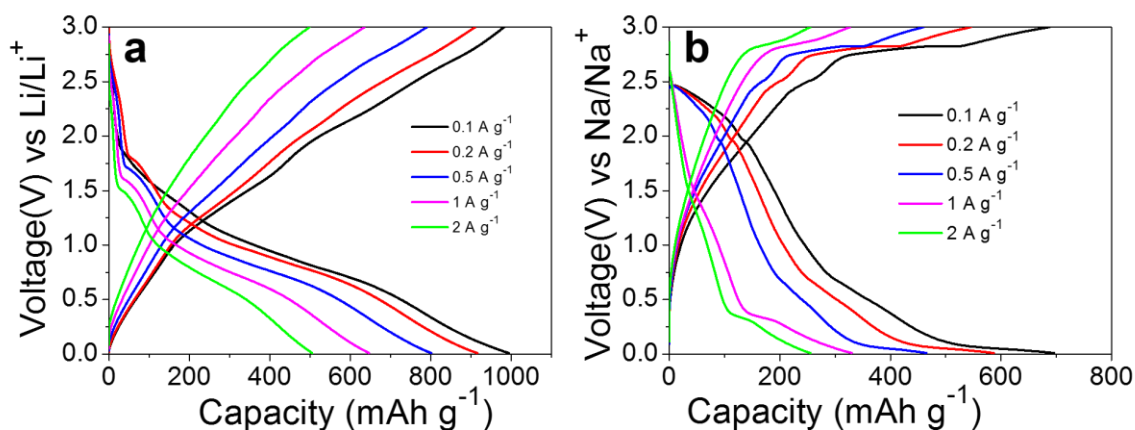

Figure S7. galvanostatic charge-discharge voltage profiles of CoO-NCNTs electrode at various current densities for LIBs and SIBs.

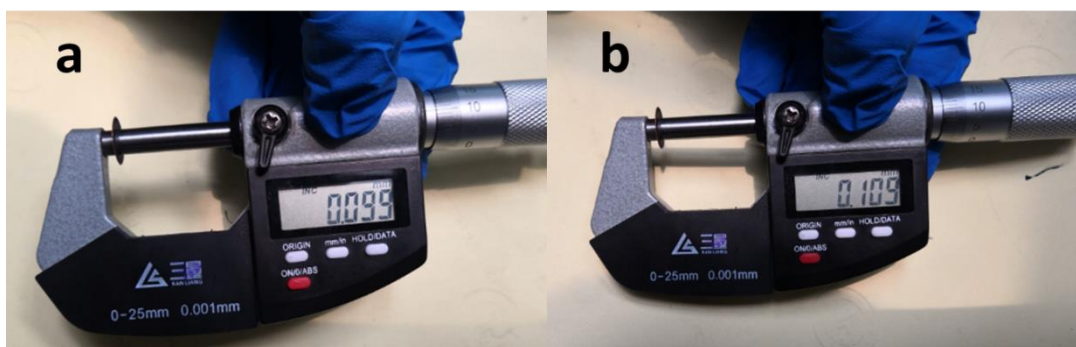

Figure S8. The measurement process of electrode thickness that before cycle (a), and after long-term cycles (b).
